# 1 **Trend analysis, modelling and impact assessment of**

## 2 **COVID-19 in Nepal**

3

4 Shital Bhandary<sup>1¶</sup>, Srijan Lal Shrestha<sup>2¶</sup>, Ram Prasad Khatiwada<sup>2¶</sup>, Deep Narayan Shah<sup>3¶</sup>,  
5 Nabin Narayan Munankarmi<sup>4¶</sup>, Megha Raj Banjara<sup>5</sup>, Resham Thapa-Parajuli<sup>6¶</sup>, Krishna Das  
6 Manandhar<sup>7</sup>, Rameshwar Adhikari<sup>8</sup>, Reshma Tuladhar<sup>5\*¶</sup>

7

8 <sup>1</sup>. School of Public Health, Patan Academy of Health Sciences, Lalitpur, Nepal

9 <sup>2</sup>. Central Department of Statistics, Tribhuvan University, Kathmandu, Nepal

10 <sup>3</sup>. Central Department of Environmental Science, Tribhuvan University, Kathmandu, Nepal

11 <sup>4</sup>. Biotechnology Society Nepal (BSN), Bhaktapur, Nepal

12 <sup>5</sup>. Central Department of Microbiology, Tribhuvan University, Kathmandu, Nepal

13 <sup>6</sup>. Central Department of Economics, Tribhuvan University, Kathmandu, Nepal

14 <sup>7</sup>. Central Department of Biotechnology, Tribhuvan University, Kathmandu, Nepal

15 <sup>8</sup>. Research Center for Applied Science and Technology, Tribhuvan University, Kathmandu,  
16 Nepal

17

18 \*Corresponding author

19 Email: [reshma.tuladhar@cdmi.tu.edu.np](mailto:reshma.tuladhar@cdmi.tu.edu.np)

20

21 <sup>¶</sup>These authors contributed equally to this work

22

## 23 **Abstract**

24 With continued global expansion of COVID-19 transmission and mounting threat of the disease,  
25 the timely analysis of its trend in Nepal and forecasting the potential situation in the country has  
26 been deemed necessary. We analyzed the trend, modelling and impact assessment of COVID-19  
27 cases of Nepal from 23<sup>rd</sup> January 2020 to 30<sup>th</sup> April 2020 to portray the scenario of COVID-19  
28 after the first phase of lockdown. Exponential smoothing state-space and autoregressive  
29 integrated moving average (ARIMA) models were constructed to forecast the cases. Susceptible-  
30 infectious-recovered (SIR) model was fit to estimate the basic reproduction number ( $R_0$ ) of  
31 COVID-19 in Nepal. There has been increase in the number of cases but the overall growth in  
32 COVID-19 was not high. Statistical modelling has shown that COVID-19 cases may continue to  
33 increase exponentially in Nepal. The basic reproduction number in Nepal being maintained at  
34 low level of 1.08 for the period of 23<sup>rd</sup> January to 30<sup>th</sup> April 2020 is an indication of  
35 effectiveness of lockdown in containing the COVID-19 spread. The models further suggest that  
36 COVID-19 might persist until December 2020 with peak cases in August 2020. On the other  
37 hand, basic reproduction number of 1.25 was computed for total cases reported for the 22<sup>nd</sup>  
38 March to 30<sup>th</sup> April 2020 period implying that COVID-19 may remain for at least for a year in  
39 the country. Thus, maintaining social distance and stay home policy with an implementation of  
40 strict lockdown in COVID-19 affected district is highly recommended.

41

42 **Keywords:** Autoregressive integrated moving average, COVID-19, Doubling time, Exponential  
43 smoothing, Susceptible-infectious-recovered model

44

45

## 46 **Introduction**

47 The ongoing Corona Virus Disease 2019 (COVID-19) caused by novel Severe Acute Respiratory  
48 Syndrome Coronavirus 2 (SARS CoV-2) was reported to have emerged from Wuhan, Hubei,  
49 China in late December 2019, where people in a seafood-wholesale wet market suffered from a  
50 mysterious pneumonia [1]. World Health Organization (WHO) declared the outbreak as public  
51 health emergency of international concern on 30<sup>th</sup> January 2020, announced a new name for this  
52 disease as COVID-19 on 11<sup>th</sup> February 2020 and pandemic on 11<sup>th</sup> March 2020 [2].

53  
54 With rapid spread in Europe, America and Asia, COVID-19 was confirmed globally in  
55 3,090,445 people with 217,769 deaths by 30<sup>th</sup> April 2020 [3]. The highest infection and death toll  
56 have been recorded in the USA followed by countries in Europe, Eastern Mediterranean, South-  
57 East Asia, Western Pacific and least in Africa [4].

58  
59 The first case of COVID-19 in Nepal reported in a 32 years old Nepalese male who was admitted  
60 to hospital upon exhibiting mild symptoms, later discharged on 17<sup>th</sup> January 2020 after  
61 improvement in clinical condition was a returnee from Wuhan City on 9<sup>th</sup> January 2020 [5]. On  
62 24<sup>th</sup> January 2020 the infection was officially confirmed COVID-19 after reported positive from  
63 WHO reference laboratory in Hong Kong [5, 6]. Later the second case was confirmed on 23<sup>rd</sup>  
64 March 2020 in a 19 years old female who returned from France via Doha, Qatar [7]. On 24<sup>th</sup>  
65 March 2020 the Government of Nepal implemented nationwide lockdown advising residents to  
66 stay at home.

67

68 Until 13<sup>th</sup> April 2020, the cases in Nepal were reported from the people who recently returned  
69 from abroad, and Indian nationals residing in Nepal where the latter case was in majority. The  
70 first case of indigenous transmission confirmed on 4<sup>th</sup> April 2020 in a 34-year-old woman from  
71 Kailali District was a relative of the infected patient travelled from India [7]. By the end of the  
72 first phase of lock down of 28<sup>th</sup> April 2020, 54 cases have been confirmed with documentation of  
73 no deaths [6]. COVID-19 has spread in 10 Districts of Nepal with Udayapur reported the  
74 maximum number of 25 cases.

75  
76 Considered as the standard laboratory test for the diagnosis of COVID-19 the cases were  
77 confirmed by Reverse Transcription Real Time Polymerase Chain Reaction (RT-PCR) [8, 9].  
78 Until 30<sup>th</sup> April 2020, a total of 12,011 RT-PCR tests and 46860 Rapid Diagnostic Test (RDT)  
79 were performed in Nepal out of which 57 were tested positive. In consideration of numerous  
80 COVID-19 cases being detected in Nepal it has been essential to let the Nepal Government be  
81 prepared for the most predictable upcoming situation to tackle the COVID-19 pandemic. This  
82 paper, therefore, assessed the descriptive and trend analysis on growth of cases, its doubling  
83 time, statistical and epidemiological model and impacts.

84

## 85 **Materials and Methods**

### 86 **Data sources**

87 The secondary data from Ministry of Health and Population (MoHP), Nepal, Health Emergency  
88 Operation Centre, and data from relevant websites related to COVID-19 in Nepal were analyzed.  
89 Trend analysis was performed from daily compiled data of 102 days from the last week of  
90 January 2020 till the end of April 2020. Major variables associated with the disease; such as

91 demographic variables of the cases, diagnostic tests including RT-PCR and RDT, number of  
92 cumulative and daily cases as well as that of recovered, quarantined and isolated cases were  
93 considered. Additionally, analysis of important variables such as cases as percent of PCR tests,  
94 doubling time of COVID-19 cases for Nepal was weekly assessed and represented graphically.  
95 Finally, different time points were used to develop predication models while impact assessments  
96 have been analyzed using the whole data.

97

## 98 **Statistical analysis: ETS and ARIMA models**

99 The exponential smoothing state-space method (which basically comprises ‘Error, Trend, and  
100 Seasonal’ components in smoothing procedure of an event under consideration; hence named  
101 ETS model) which takes information into comprehensive consideration and ARIMA model [10]  
102 were used to forecast COVID-19 cases for Nepal by fitting in R software using forecast package  
103 [11]. We selected the best ETS model and best ARIMA model for 99 days official cumulative  
104 COVID-19 cases from 23<sup>rd</sup> January to 30<sup>th</sup> April 2020 and forecasted the cases for next 14 days  
105 (1<sup>st</sup> May – 14<sup>th</sup> May 2020). An attempt has been made in the direction of epidemiological  
106 modelling through application of SIR model (see next section for detail) based upon the suitable  
107 parameter values for Nepal.

108

## 109 **Mathematical analysis: SIR model**

110 We used SIR model, a compartmental model where population is divided into three  
111 compartments: susceptible, infectious and recovered. We need two types of rates to move from

112 one compartment to other viz. rate of transmission ( $\beta$ ) to move from Susceptible to Infectious  
113 compartment and rate of recovery ( $\gamma$ ) to move Infectious to Recovered compartment as follows

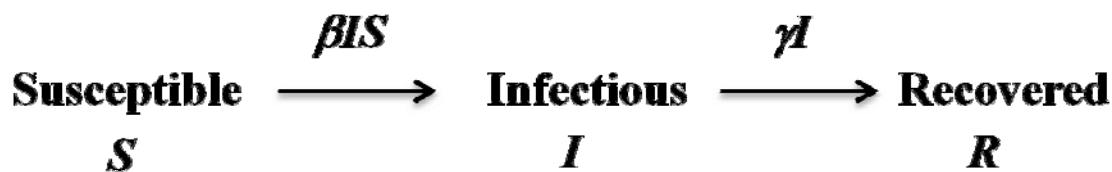

114

115

116 This type of model is a dynamic model as the population in these three compartments changes  
117 with each unit of time and this can be modelled using differential equations. The simple SIR  
118 model without vital dynamics i.e. births and deaths are modelled as follows:

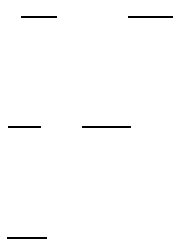

119 Where, S, I, and R were stock of susceptible, infected and recovered population. Change in S, I  
120 and R with respect to time was computed with initial value of  $I = 1$  and  $R = 0$  to represent the  
121 first COVID-19 case of Nepal at 23<sup>rd</sup> January 2020. S was taken as 29 million, which is the  
122 projected population of Nepal for April 2020 [12]. Two SIR models were fitted, first with basic  
123 reproduction number ( $R_0$ ) of 2.5 (global average of COVID-19) and 1.0 (to make COVID-19  
124 endemic) in Nepal. To solve differential equations (i), (ii) and (iii), we used the Runge-Kutta  
125 method available in the “deSolve” package [13] in R software version 3.5.2. We also fitted SIR  
126 model for the official COVID-19 cases between 23<sup>rd</sup> January and 30<sup>th</sup> April as well as between  
127 22<sup>nd</sup> March and 30<sup>th</sup> April 2020 and computed  $R_0$  for these periods using Limited Memory-  
128 Broyden-Fletcher-Goldfarb-Shanno (LM-BFGS) optimization algorithm in the R software. Since

129 second COVID-19 case was reported on 23<sup>rd</sup> March 2020, we also used period between 22<sup>nd</sup>  
130 March and 30<sup>th</sup> April 2020 to check the effectiveness of the lockdown started from 24<sup>th</sup> March  
131 2020 in Nepal. We created the change in the infected compartment for Nepal using these Ro  
132 values and derived the time-based effect of COVID-19 cases for Nepal.

133

134 Further the aggregate macroeconomic policy responses adopted by Nepal [14], tourism related  
135 employment data [15] and possible scenarios on tourism [16] was reviewed for assessing the  
136 impact of COVID-19 created disaster on economics

137

## 138 **Results**

### 139 **Trend of the cases**

140 From 21<sup>st</sup> January 2020 till 30<sup>th</sup> of April 2020, a total of 57 COVID-19 cases have been  
141 confirmed in Nepal. The increase in case was slow with only ten cases recorded between 21<sup>st</sup>  
142 March and 10<sup>th</sup> April, 2020, but due to sudden sharp rise in new cases in some days, the trend of  
143 daily new cases was found erratic and inconsistent (S1 File). The growth curve of the total cases  
144 in Nepal resembles a logistic curve where the total number of cases and the curve for active  
145 COVID-19 persons have also risen in similar manner but a dip in active cases have been  
146 observed lately (S2 File). The number of recoveries has also risen significantly in the recent past  
147 two weeks which is a positive sign.

148

149 In Nepal, male with age between 21- 30 years are found more infected. Highest number of  
150 infected male populations may be related to the cases dominated from the male who lived in

151 Bhulke, Triyuga Municipality, Udayapur district and the person who came in contact with them.  
152 Majority of infected belong to the people who entered Nepal from India while some of the  
153 infected had a history of travel from other countries such as China, France, UAE, Belgium, UK  
154 and Saudi Arabia [7].

155  
156 From the trend graph of RT-PCR tests (S3 File) the percent of cases have rapidly decreased as  
157 the number of tests increased in the month of February and has remained consistently low  
158 between 0.2 to 0.5 % thereafter.

159

## 160 **Doubling time of COVID-19 cases in weekly data analysis**

161 Examination of doubling time of the COVID-19 cases in Nepal based upon weekly data analysis  
162 showed that there has been an increase in doubling time steadily starting around third week of  
163 March till second week of April from 3.5 to 14 days with a long span of time for doubling  
164 duration initially from one reported case to two. Thereafter, it dropped sharply followed by  
165 unexpected sudden rise in the cases during the third week of April. After that, it has again  
166 increased to around 11 days showing a slowing down of trend of the infected persons. The  
167 overall picture shows that there have been ups and downs in the doubling time of the COVID-19  
168 cases in Nepal and is currently around 11 days (Fig 1)

169

170 **Fig 1. Doubling time of COVID-19 cases in Nepal (Based upon weekly data analysis from**  
171 **22<sup>nd</sup> January 2020 to end of April 2020**

172

## 173 **Statistical Modelling of COVID-19 Cases of Nepal**



174 The best ETS state-space model was found to be ETS (M, A, N) for the data i.e. exponential  
175 smoothing with **Multiplicative Error, Additive Trend and No Seasonality** model. This is  
176 equivalent to Holt’s linear additive model (Hyndman and Athanasopolus 2018).

177  
178 **Fig 2. ETS decomposition of cumulative COVID-19 cases of Nepal (23<sup>rd</sup> Jan. – 17<sup>th</sup> April**  
179 **2020).**

180  
181 Forcaded cumulative COVID-19 cases using ETS (M,A,N) model revealed that COVID-19 cases  
182 were increasing at the rate of 2 cases per day in Nepal (Table 1). The 95% confidence interval of  
183 the forecasts were very wide, which means that standard errors are high and precision of the  
184 estimation is low. Thus, forecasted values may not coincide with the official reported values.

185  
186 **Table 1. Forecasted cumulative COVID-19 cases using ETS (M,A,N) model, Nepal**

| Date   | Day | Forecast | Lo 80      | Hi 80     | Lo 95       | Hi 95     |
|--------|-----|----------|------------|-----------|-------------|-----------|
| 1-May  | 100 | 58.81742 | 47.318412  | 70.31643  | 41.231205   | 76.40364  |
| 2-May  | 101 | 60.24833 | 44.396137  | 76.10053  | 36.00449    | 84.49218  |
| 3-May  | 102 | 61.67925 | 40.245795  | 83.1127   | 28.89961    | 94.45889  |
| 4-May  | 103 | 63.11016 | 35.07717   | 91.14316  | 20.2374     | 105.98293 |
| 5-May  | 104 | 64.54108 | 28.996946  | 100.08521 | 10.181018   | 118.90114 |
| 6-May  | 105 | 65.97199 | 22.051937  | 109.89205 | -1.197936   | 133.14192 |
| 7-May  | 106 | 67.40291 | 14.253802  | 120.55201 | -13.881634  | 148.68745 |
| 8-May  | 107 | 68.83382 | 5.591121   | 132.07652 | -27.887543  | 165.55519 |
| 9-May  | 108 | 70.26474 | -3.964673  | 144.49415 | -43.259349  | 183.78882 |
| 10-May | 109 | 71.69565 | -14.456318 | 157.84762 | -60.062415  | 203.45372 |
| 11-May | 110 | 73.12657 | -25.93925  | 172.19238 | -78.381525  | 224.63466 |
| 12-May | 111 | 74.55748 | -38.480945 | 187.5959  | -98.319873  | 247.43483 |
| 13-May | 112 | 75.98839 | -52.160735 | 204.13752 | -119.998786 | 271.97557 |

201 14-May 113 77.41931 -67.069942 221.90856 -143.557931 298.39655

202 Note: The negative values in the table means zero cases.

203  
 204 The cumulative COVID cases in Nepal revealed the increasing trend of COVID-19 cases with  
 205 wide variation (Fig 3).

206  
 207 **Fig 3. Cumulative COVID-19 cases of Nepal: Jan23 – 1 May 2020 using ETS (M,A,N)**  
 208 **model showing increasing trend**

209  
 210 The best ARIMA model for this 99-day data of Nepal is ARIMA (3,2,1). This means it required  
 211 two times difference of the series first to make the data stationary followed by third order  
 212 autoregressive filter and first order moving average filter to correct the autocorrelation and  
 213 forecasting error in the data. Forecasted cumulative COVID-19 cases using ARIMA (3,2,1)  
 214 model shows the forecasts obtained from this model for the next 14-day for Nepal (Table 2).

215  
 216 COVID-19 cases increasing at 2 cases per day in Nepal (Table 2). The 95% confidence intervals  
 217 were found realistic. However, the forecasts may not coincide with the official reported cases.

218  
 219 **Table 2. Forecasted cumulative COVID-19 cases using ARIMA (3,2,1) model, Nepal**

| 220 | Date   | Day | Forecast | Lo 80    | Hi 80    | Lo 95    | Hi 95    |
|-----|--------|-----|----------|----------|----------|----------|----------|
| 221 | 01-May | 100 | 58.13008 | 55.92091 | 60.33926 | 54.75144 | 61.50873 |
| 222 | 02-May | 101 | 59.77956 | 56.73407 | 62.82506 | 55.12188 | 64.43725 |
| 223 | 03-May | 102 | 61.90513 | 58.17988 | 65.63039 | 56.20784 | 67.60242 |
| 224 | 04-May | 103 | 62.92401 | 58.52157 | 67.32645 | 56.19105 | 69.65697 |
| 225 | 05-May | 104 | 64.09565 | 58.49546 | 69.69583 | 55.53091 | 72.66038 |

---

|     |        |     |          |          |          |          |           |
|-----|--------|-----|----------|----------|----------|----------|-----------|
| 226 | 06-May | 105 | 65.56641 | 58.75999 | 72.37282 | 55.15689 | 75.97592  |
| 227 | 07-May | 106 | 67.29525 | 59.33921 | 75.25128 | 55.12754 | 79.46296  |
| 228 | 08-May | 107 | 68.63131 | 59.52688 | 77.73574 | 54.70728 | 82.55534  |
| 229 | 09-May | 108 | 69.91791 | 59.47234 | 80.36349 | 53.94279 | 85.89304  |
| 230 | 10-May | 109 | 71.3307  | 59.46664 | 83.19476 | 53.18619 | 89.47521  |
| 231 | 11-May | 110 | 72.88073 | 59.58482 | 86.17663 | 52.5464  | 93.21505  |
| 232 | 12-May | 111 | 74.3018  | 59.55531 | 89.0483  | 51.74899 | 96.85462  |
| 233 | 13-May | 112 | 75.66426 | 59.37703 | 91.95149 | 50.75509 | 100.57344 |
| 234 | 14-May | 113 | 77.06874 | 59.17249 | 94.96499 | 49.69879 | 104.43869 |

---

235

236

237 Forecast from ARIMA (3,2,1) model were lower than the official COVID-19 cases of Nepal  
238 between 1<sup>st</sup> and 14<sup>th</sup> May 2020 (Fig 4). This means we need other approaches for modelling  
239 COVID-19 cases in Nepal.

240

241 **Figure 4. Cumulative COVID-19 cases of Nepal: 23<sup>rd</sup> Jan. – 1<sup>st</sup> May 2020 using ARIMA**  
242 **(3,2,1) model showing increasing trend**

243

## 244 **Mathematical Modelling of COVID-19 cases of Nepal**

### 245 **Scenario 1**

246 Beta =  $1/2 = 0.5$  per person; Beta =  $0.5/29,000,000 = 1.72 \times 10^{-8}$  for Nepal and Gamma =  $1/5 =$   
247  $0.2$  (reciprocal of average incubation period of COVID-19 cases) (Fig 5). This gave basic  
248 reproduction number (Ro) as  $0.5/0.2 = 2.5$ , which is the average Ro around the world [17].

249

250 **Fig 5. SIR model with  $\beta = 0.5$  and  $\gamma = 0.2$  for  $N=29,000,000$  of Nepal which gave basic**  
251 **reproduction number  $R_0=2.5$**

252  
253 This SIR model shows that 6770893 persons will be infected around 60 days whereas 38,560  
254 persons will be infected at 100 day since the first case appeared in Nepal.

255

## 256 **Scenario 2**

257 Beta =  $1/5 = 0.2$  per person; Beta =  $0.2/29,000,000 = 6.689 \times 10^{-9}$  for Nepal and Gamma =  $1/5 =$   
258  $0.2$  (reciprocal of average incubation period of COVID-19 cases) (Fig 6). This gives basic  
259 reproduction number ( $R_0$ ) as  $0.2/0.2 = 1$ .

260

261 **Fig 6. SIR model with  $\beta= 0.5$  and  $\gamma= 0.5$  for  $N=29,000,000$  of Nepal giving basic**  
262 **reproduction number  $R_0=1$**

263

264 This SIR model shows that only 1 persons will be infected each day as the basic reproduction  
265 number is 1.

## 266 **Scenario 3**

267 We used estimated  $\beta = 0.5197019$  and  $\gamma = 0.4802873$  obtained for official cases between 23<sup>rd</sup>  
268 January and 30<sup>th</sup> April 2020 using LM-BFGS optimization in R software giving  $R_0 = \beta/\gamma = 1.08$ .  
269 This SIR model revealed that there will be maximum of 532,627 cases if it continues with this  
270  $R_0$ . (Fig 7).

271

272 Estimated  $\beta$  and  $\gamma$  obtained using LM-BFGS optimization in R software for official cases  
273 reported between 22<sup>nd</sup> March and 30<sup>th</sup> April 2020 were 0.5553948 and 0.4446052 respectively  
274 giving  $R_0 = \beta/\gamma = 1.25$ . This SIR model revealed that there will be maximum of  
275 6197014 if it continues with this  $R_0$ .

276

### 277 **Fig 7. SIR model with official cumulative COVID-19 cases of Nepal if $R_0=1.25$**

278

279 When  $R_0=1$  was considered for the official data on 30<sup>th</sup> April 2020 then maximum cases will be  
280 58.5462 and COVID-19 epidemic will be over by June 2020 at this  $R_0$  in Nepal (Fig 8).

281

### 282 **Fig 8. Data driven SIR model fit with three $R_0$ values (1, 1.08 and 1.25) for Nepal**

283 SIR model based on official data revealed that COVID-19 cases will increase in Nepal with  $R_0$   
284 of 1.08 and the epidemic will be over only by December 2020 with peak of cases on August  
285 2020 for this  $R_0$ . On the other hand, COVID-19 epidemic will only be over around one year time  
286 if  $R_0$  continues as 1.25.

287

## 288 **Impact**

289 Tourism associated employment loss and its impact on livelihood is an external sector shock in  
290 the Nepalese economy owing to COVID-19. Among the top 10 international tourist arrival in  
291 Nepal: India, Germany, France, UK, and USA have profoundly affected economies due to  
292 COVID-19 while Australia, South Korea, China and Thailand are already on the verge of  
293 flattening the curve [18]. It indicates the decaying demand for international tourism in Nepal.  
294 The “International-Tourism-Arrival elasticities to Employment” in the case of Nepalese tourism

295 are 0.54 for direct employment and 0.57 for the total-employment that includes indirect  
296 employment also [19]. If the restrictions on global tourism remain till end of July, international  
297 tourism arrival in Nepal will shrink by 58%. As the elasticity coefficient is 0.54, the direct  
298 tourism-related jobs will reduce by 31%. It means the tourism sector will directly result in loss of  
299 156,000 jobs. If the COVID-19 related restriction be extended till December, international  
300 tourism will shrink by 78% and the direct tourism-related employment will reduce by 42%,  
301 which totals 210,000 jobs loss. Similarly, out of 700,000 total tourism-related jobs, 231,000 to  
302 311,000 jobs will disapper for several months which is a scary situation for a developing  
303 economy like Nepal.

304

## 305 **Discussion**

306 The analysis of COVID-19 cases in Nepal provides an insight into situation till implementation  
307 of first phase of lockdown and prediction of expected scenario thereafter. The data of the cases  
308 were based on the results of test confirmed by RT-PCR. From the trend graph of cases as percent  
309 of RT-PCR tests the percent of cases have rapidly decreased as the number of tests increased in  
310 the month of February and has remained more or less constant between 0.2 to 0.5 % thereafter.  
311 This is an indication of absence of significant rise in COVID-19 cases despite increase in the  
312 tests substantially in the months of March-April in Nepal, although the number of tests may still  
313 not be sufficient to cover large proportion of population in Nepal. The overall growth of COVID-  
314 19 cases in Nepal is not high, which can be taken positively and credited to the lockdown  
315 implemented by Nepal Government and awareness of the diseases through media along with the  
316 preventive measures. Doubling time of COVID-19 cases along with incubation period of the

317 coronavirus are important variables in the spread of the epidemic. The incubation period of the  
318 virus has been reported with certain amount of variability (2-14 days) with the median average  
319 hovering around 5 days with possible outliers up to 27 days [20].

320  
321 The overall picture shows that there has been ups and downs in the doubling time of the COVID-  
322 19 cases in Nepal and is currently around 11 days (Fig 1) which is just above 10 days doubling  
323 time of COVID-19 cases in India as reported by different news channels of India though the total  
324 cases in Nepal are still negligible compared to that of India. Bhandary (2020) has stated that with  
325 implementation of lockdown the doubling time increased from 5 days to 15 days [21].

326  
327 Statistical modelling showed that COVID-19 cases may continue to increase exponentially in  
328 Nepal. Forecasts from best ARIMA model (MAPE = 4.18) are found to be more precise than the  
329 ETS exponential smoothing model (MAPE = 4.55). Forecasts from best ARIMA model will be a  
330 valid estimate if clusters with more than 10 cases will be found there in the future too. This has  
331 already happened once between 18<sup>th</sup> April and 1<sup>st</sup> May 2020 in Nepal and thus requires particular  
332 attention of the concerned administrators and policy makers. However, it will not be valid if the  
333 cases will be increased in higher rates in the country. ETS and ARIMA models produced  
334 estimated values of COVID-19 cases for Nepal based upon the currently available official data.  
335 Despite the possibility of questions on whether sufficient tests have been conducted for such  
336 modelling, COVID-19 cases in Nepal has not risen sharply in high numbers and the total cases in  
337 Nepal are still below 100 but expected to rise in coming days.

338

339 Compartmental SIR model on the other hand reveals that nearly seven million Nepali population  
340 might be infected with average global basic reproduction number of 2.5 for COVID-19 cases and  
341 maximum cases would have reached within 60 days of the first case, which fortunately did not  
342 happen in the country. The total number of cases would have been only 1 if the basic  
343 reproduction number remained at one in Nepal, which also did not happen as 30 cases were  
344 reported by 17<sup>th</sup> April 2020 and 58 in 30<sup>th</sup> April 2020.

345  
346 Basic reproduction number of Nepal was computed as 1.08 for 23<sup>rd</sup> Jan – 30<sup>th</sup> April 2020 period,  
347 which means lockdown was working well to maintain low level of basic reproduction number in  
348 the country. Further, it also revealed that COVID-19 will only be over by December 2020 with  
349 peak cases in August 2020 with  $R_0$  of 1.08. On the other hand, basic reproduction number of  
350 1.25 was computed for total cases reported from 22<sup>nd</sup> March to 30<sup>th</sup> April 2020 period, which  
351 means that COVID-19 did not increase exponentially but it will remain for at least a year in the  
352 country. Thus, these results clearly suggests to continue the lockdown in the hotspots (heavily  
353 affected areas) and slowly open the lockdown on least affected areas with social/physical  
354 distancing and personal hygiene maintenance in Nepal.

355  
356 This analysis we performed have been restricted to the lockdown implemented from 24<sup>th</sup> March  
357 2020 till the end of April 2020 and not a final assessment yet considering that the spread of  
358 disease could still be at the early stage in Nepal and calls for re-assessments periodically in  
359 future as well till the pandemic phases out.

360



361 Considering the containment of outbreak lockdown is necessary, it will have huge impact in the  
362 country's economy and the possible scenario of easing international travel has been  
363 contemplated. Based on the [22], the best-case scenario assumes a gradual opening of  
364 international borders and easing of travel restrictions in early July. It will witness reduction in  
365 global tourism arrival likely by 58 per cent. The second scenario assuming the international  
366 tourism arrival shrinkage by 70 per cent points is due to the restriction in situations goes until  
367 early September. Relatively uncomfortable third scenario explains the easing of the restriction  
368 sustains till December with arrival number reduction by 78 per cent. Considering these three  
369 optimistic scenarios, we relate the international tourism arrival and employment plausibility in  
370 Nepal.

371  
372 The tourism sector faced a sharp downswing since the COVID-19 outbreak and with uncertainty  
373 continued to dominate. The tourism sector will loose about US\$ 910 billion to US\$ 1.2 trillion  
374 in export revenues from tourists. Most importantly, about 100 to 120 million direct  
375 tourism related jobs are at stake.

376  
377 The tourism sector contributes about 2% of the GDP and some 15-20% of the foreign reserve.  
378 Furthermore, this sector is generating a significant volume of employment in Nepal. In Nepal,  
379 there are about 500,000 direct and 700,000 total jobs in the tourism sector. Nepalese tourism  
380 sector is one of the livelihood options to many marginal people. When the lockdown struck the  
381 tourism sector, the livelihood issues arose that informal or unorganized job holders will  
382 experience hardest hit.

383

384 The unprecedented lockdown also makes domestic tourism very unlikely, which means that  
385 slowdown of global tourism is going to be the decisive factor influencing employment in the  
386 tourism sector in Nepal.

387

## 388 **Conclusions**

389 The data based trends for COVID-19 epidemic in Nepal have been analyzed followed by  
390 assessment of the outbreak impacts in comparison with existing models. The outcomes of the  
391 research can be summarized as follows:

- 392 1. The total COVID-19 cases are increasing by following the logistic curve. However, there  
393 has been a variation in the doubling time during the analysis period, which can be  
394 attributed to the effect of lockdown imposed by the Government. The forecasts from best  
395 ARIMA model may provide more precise and valid estimates if clusters with more than  
396 10 cases are found in future.
- 397 2. As in compartmental SIR model, nearly 7 million people might get infected. With an  
398 average global basic reproduction number of 2.5 for COVID-19 cases, maximum cases  
399 would have reached within 65 days, which fortunately did not happen in the country. The  
400 basic reproduction number in Nepal being maintained at low level of 1.08 for the period  
401 between 23<sup>rd</sup> January and 30<sup>th</sup> April, 2020 is an indication of effectiveness of the  
402 lockdown in containing the COVID-19 spread.
- 403 3. Further, the model has suggested that the COVID-19 will only be over by December  
404 2020 with the peak cases in August 2020. On the other hand, basic reproduction number  
405 of 1.25 was computed for total cases reported for 22<sup>nd</sup> March – 30<sup>th</sup> April 2020 period,  
406 which implies that COVID-19 may persist at least for a year in the country.

407 Thus, the results so far obtained clearly recommend continuing the lockdown in the  
408 hotspots (heavily affected areas) and gradually easing the lockdown in the least affected  
409 areas with strict social/physical distancing and personal hygiene maintenance.

410 4. Since the COVID-19 is expected to destroy the Nepalese economy on many fronts a  
411 robust impact study on economic impact of COVID-19 in Nepalese economy is  
412 suggested.

413

## 414 **Acknowledgements**

415 We are thankful to Prof Dr. Dinesh Raj Bhujy, Academician, Nepal Academy of Science and  
416 Technology for his encouragement. We acknowledge Ministry of Health and Population, Nepal  
417 Government for the data on COVID-19.

418

## 419 **References**

420 1. Wu YC, Chen CS, Chan YJ. The outbreak of COVID-19: An overview. J Chin Med  
421 Assoc. 2020; 83(3):217-220.

422 2. WHO. Naming the coronavirus disease (COVID-19) and the virus that causes it. 2020.  
423 Available from: [https://www.who.int/emergencies/diseases/novel-coronavirus-](https://www.who.int/emergencies/diseases/novel-coronavirus-2019/technical-guidance/naming-the-coronavirus-disease-(covid-2019)-and-the-virus-that-causes-it)  
424 [2019/technical-guidance/naming-the-coronavirus-disease-\(covid-2019\)-and-the-virus-](https://www.who.int/emergencies/diseases/novel-coronavirus-2019/technical-guidance/naming-the-coronavirus-disease-(covid-2019)-and-the-virus-that-causes-it)  
425 [that-causes-it](https://www.who.int/emergencies/diseases/novel-coronavirus-2019/technical-guidance/naming-the-coronavirus-disease-(covid-2019)-and-the-virus-that-causes-it)

426 3. WHO. Coronavirus disease 2019 (COVID-19), Situation Report-101. 2020. Available  
427 from: [https://www.who.int/docs/default-source/coronaviruse/situation-reports/20200430-](https://www.who.int/docs/default-source/coronaviruse/situation-reports/20200430-sitrep-101-covid-19.pdf?sfvrsn=2ba4e093_2)  
428 [sitrep-101-covid-19.pdf?sfvrsn=2ba4e093\\_2](https://www.who.int/docs/default-source/coronaviruse/situation-reports/20200430-sitrep-101-covid-19.pdf?sfvrsn=2ba4e093_2)

- 429 4. WHO. Rolling updates on coronavirus disease (COVID-19). 2020. Available from:  
430 [https://www.who.int/emergencies/diseases/novel-coronavirus-2019/events-as-they-](https://www.who.int/emergencies/diseases/novel-coronavirus-2019/events-as-they-happen)  
431 happen
- 432 5. Bastola A, Sah R, Rodriguez-Morales AJ, Lal BK, Jha R, Ojha HC, et al. The first 2019  
433 novel coronavirus case in Nepal. *Lancet Infect Dis.* 2020; 20(3):279-280.
- 434 6. MoHP. Coronaovirus disease (COVID-19) outbreak updates and resource material.  
435 Health Emergency and Disaster Management Unit, Health Emergency Operation Center  
436 2020. Available from: [https://heoc.moHP.gov.np/update-on-novel-corona-virus-COVID-](https://heoc.moHP.gov.np/update-on-novel-corona-virus-COVID-19)  
437 19
- 438 7. Pun SB, Mandal S, Bhandari L, Jha S, Rajbhandari S, Mishra AK, et al. Understanding  
439 COVID-19 in Nepal. *J Nepal Health Res Counc.* 2020; 18(1):126-127.
- 440 8. Paudel S, Dangal G, Chalise A, Bhandari TR, Dangal O. The Coronavirus Pandemic:  
441 What Does the Evidence Show? *J Nepal Health Res Counc.* 2020; 18(1):1-9.
- 442 9. Yip CC, Ho CC, Chan JF, To KK, Chan HS, Wong SC, et al. Development of a Novel,  
443 Genome Subtraction-Derived, SARS-CoV-2-Specific COVID-19-nsp2 Real-Time RT-  
444 PCR Assay and Its Evaluation Using Clinical Specimens. *Int J Mol Sci.* 2020;  
445 21(7):e2574. <http://doi:2510.3390/ijms21072574>.
- 446 10. Hyndman R, Athanasopoulos G: Forecasting: principles and practice. In: OTexts. 2nd  
447 edition edn: Melbourne, Australia; 2018.
- 448 11. Hyndman R, Athanasopoulos G, Caceres G, Chhay L, O'Hara-Wild M, Petropoulos F, et  
449 al. Package forecast: Forecasting functions for time series and linear models. 2020.  
450 Available from: <https://github.com/robjhyndman/forecast>
- 451 12. WPP. World Population Prospects. 2020. Available from: <https://population.un.org/wpp/>

- 452 13. Soetaert K, Petzoldt T, Setzer RW. Solving differential equations in R: package deSolve.  
453 Journal of Statistical Software. 2010; 33(9):1-25.
- 454 14. IMF. Policy Response to COVID-19. Policy Tracker. 2020. Available from:  
455 [https://www.imf.org/en/Topics/imf-and-COVID19/Policy-Responses-to-COVID-](https://www.imf.org/en/Topics/imf-and-COVID19/Policy-Responses-to-COVID-19?fbclid=IwAR3nM0PE75qzr-WajzLLLddfm9dSSYIYJ_lfzbObGLqJILZdfmhhsb-QIkI#N)  
456 [19?fbclid=IwAR3nM0PE75qzr-WajzLLLddfm9dSSYIYJ\\_lfzbObGLqJILZdfmhhsb-](https://www.imf.org/en/Topics/imf-and-COVID19/Policy-Responses-to-COVID-19?fbclid=IwAR3nM0PE75qzr-WajzLLLddfm9dSSYIYJ_lfzbObGLqJILZdfmhhsb-QIkI#N)  
457 [QIkI#N](https://www.imf.org/en/Topics/imf-and-COVID19/Policy-Responses-to-COVID-19?fbclid=IwAR3nM0PE75qzr-WajzLLLddfm9dSSYIYJ_lfzbObGLqJILZdfmhhsb-QIkI#N)
- 458 15. WTTC. Economic impact of tourisms. World travel and tourism corporation. 2020.  
459 Available from: <https://wttc.org/Research/Economic-Impact>
- 460 16. UNWTO Report: International tourist number could fall. 2020. Available from:  
461 [https://www.unwto.org/news/COVID-19-international-tourist-numbers-could-fall-60-80-](https://www.unwto.org/news/COVID-19-international-tourist-numbers-could-fall-60-80-in-2020)  
462 [in 2020](https://www.unwto.org/news/COVID-19-international-tourist-numbers-could-fall-60-80-in-2020)
- 463 17. Liu Y, Gayle AA, Wilder-Smith A, Rocklov J. The reproductive number of COVID-19 is  
464 higher compared to SARS coronavirus. J Travel Med. 2020; 27(2):taaa021. doi:  
465 [10.1093/jtm/taaa021](https://doi.org/10.1093/jtm/taaa021).
- 466 18. Roser M, Ritchie H. Our World in Data: Coronavirus Pandemic (COVID-19). 2020.  
467 Available from: <https://ourworldindata.org/the-covid-19-pandemic-slide-deck>
- 468 19. Thapa-Parajuli R, Paudel R. Tourism Sector Employment Elasticity in Nepal: An  
469 Analysis. 2020.
- 470 20. Worldometer. 2020. Available from :  
471 <https://www.worldometers.info/coronavirus/coronavirus-incubation-period/>
- 472 21. Bhandary S. Effectiveness of lockdown as COVID-19 intervention: official and  
473 computed cases in Nepal. Journal of Patan Academy of Health Sciences. 2020; 7(1):37-  
474 41.

475 22. UNWTO Report. International Tourist Number Could Fall. 2020. Available from:  
476 <https://www.unwto.org/news/covid-19-international-tourist-numbers-could-fall-60-80-in->  
477 2020

478

## 479 **Supporting information**

480 **S1 Fig. Trend of daily new cases and recovered cases of COVID-19 in Nepal**

481 **S2 Fig. Trend of active, recovered and total number of COVID-19 cases with time**

482 **S3 Fig. Number of cases as percentage of total PCR tests conducted on the samples**

483 **from COVID-19 suspected**

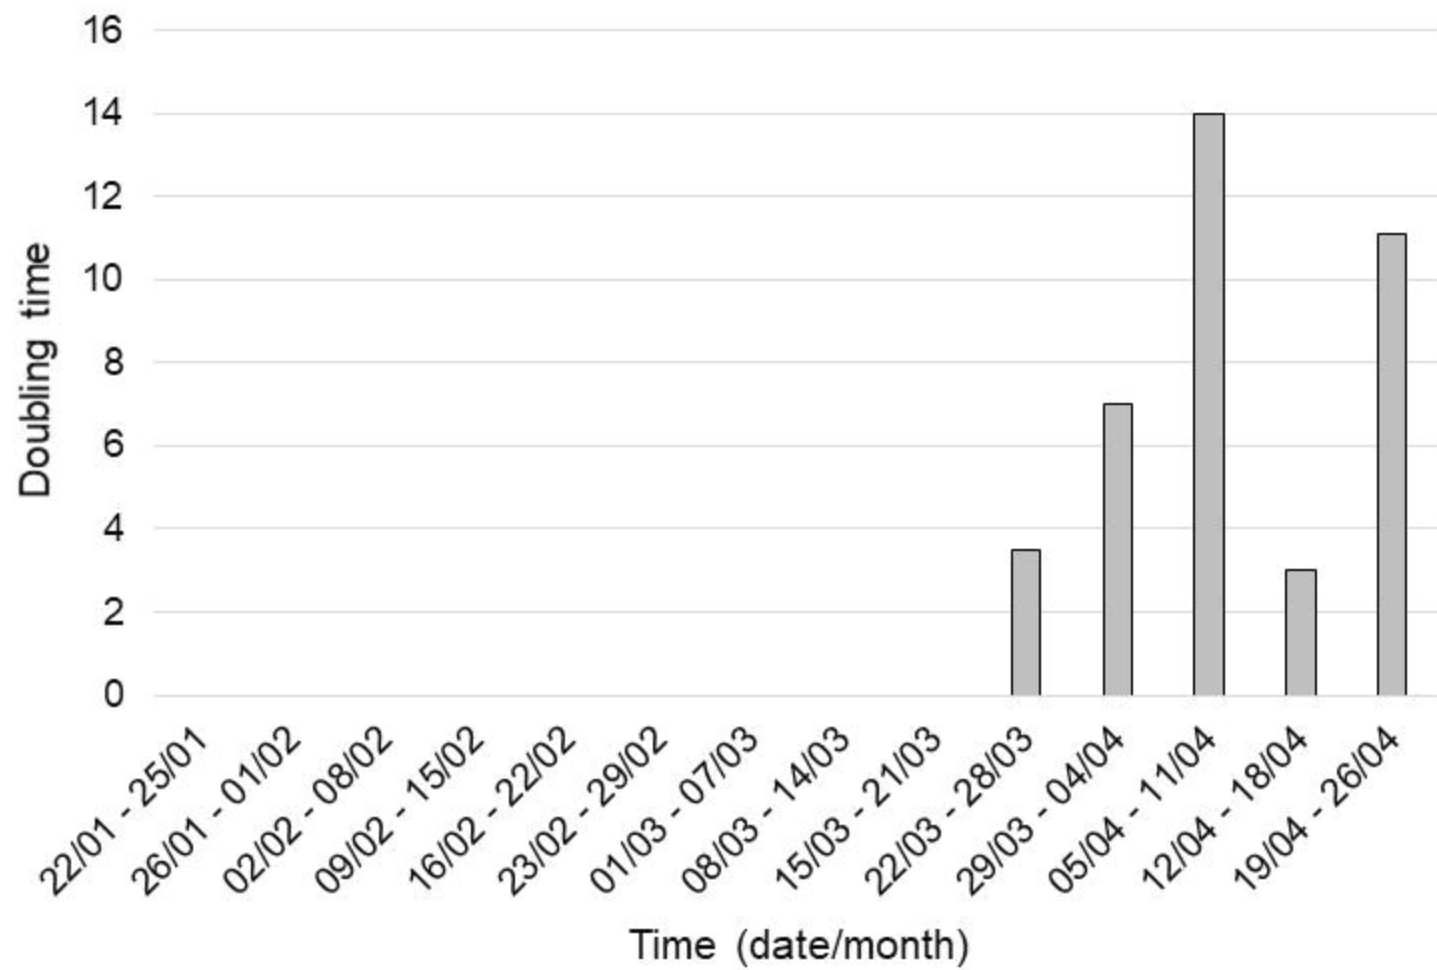

# Decomposition by ETS(M,A,N) method

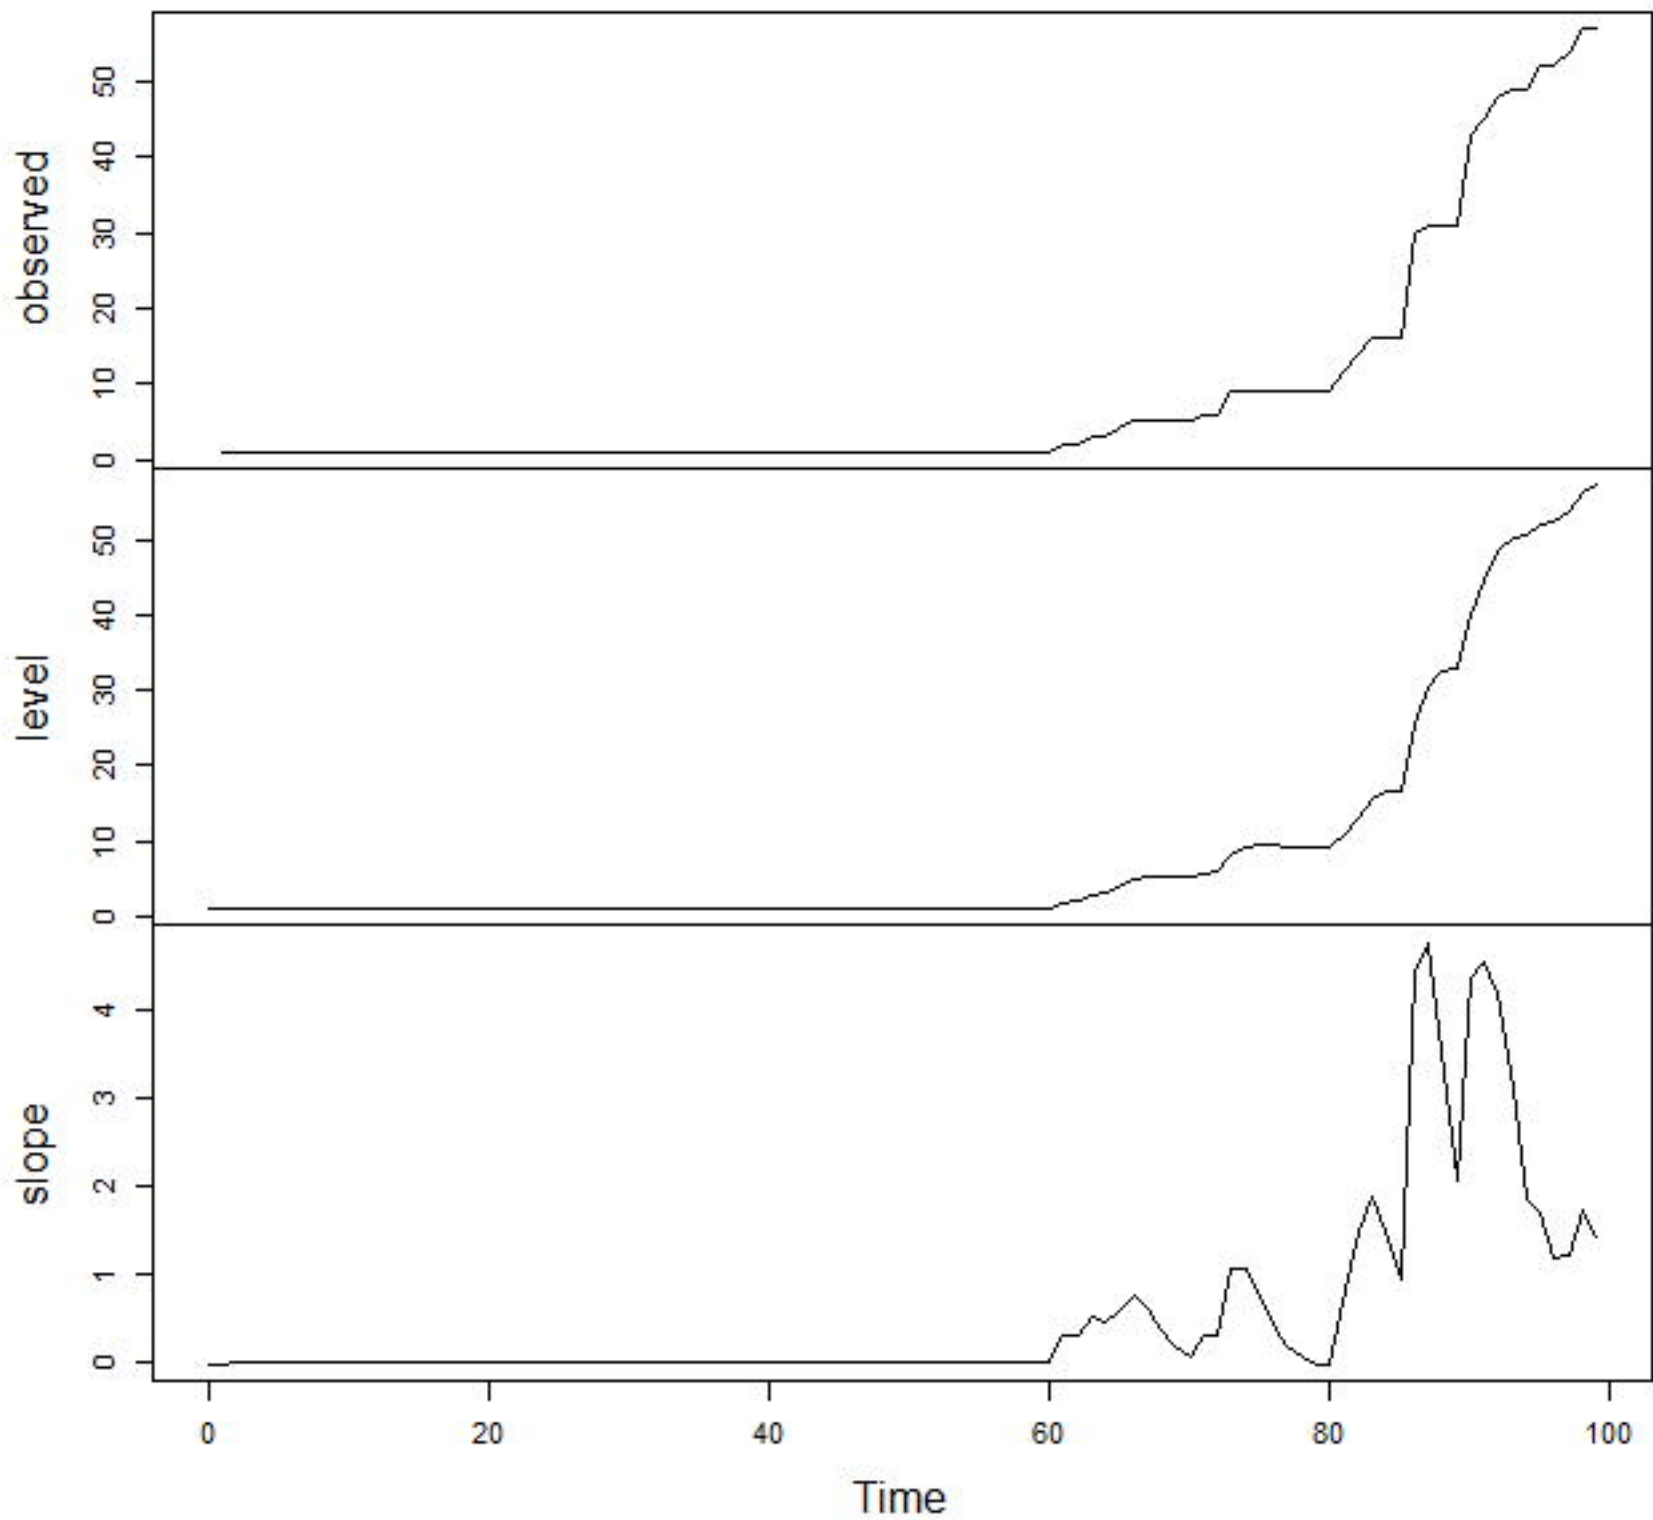



# Forecasts from ETS(M,A,N)

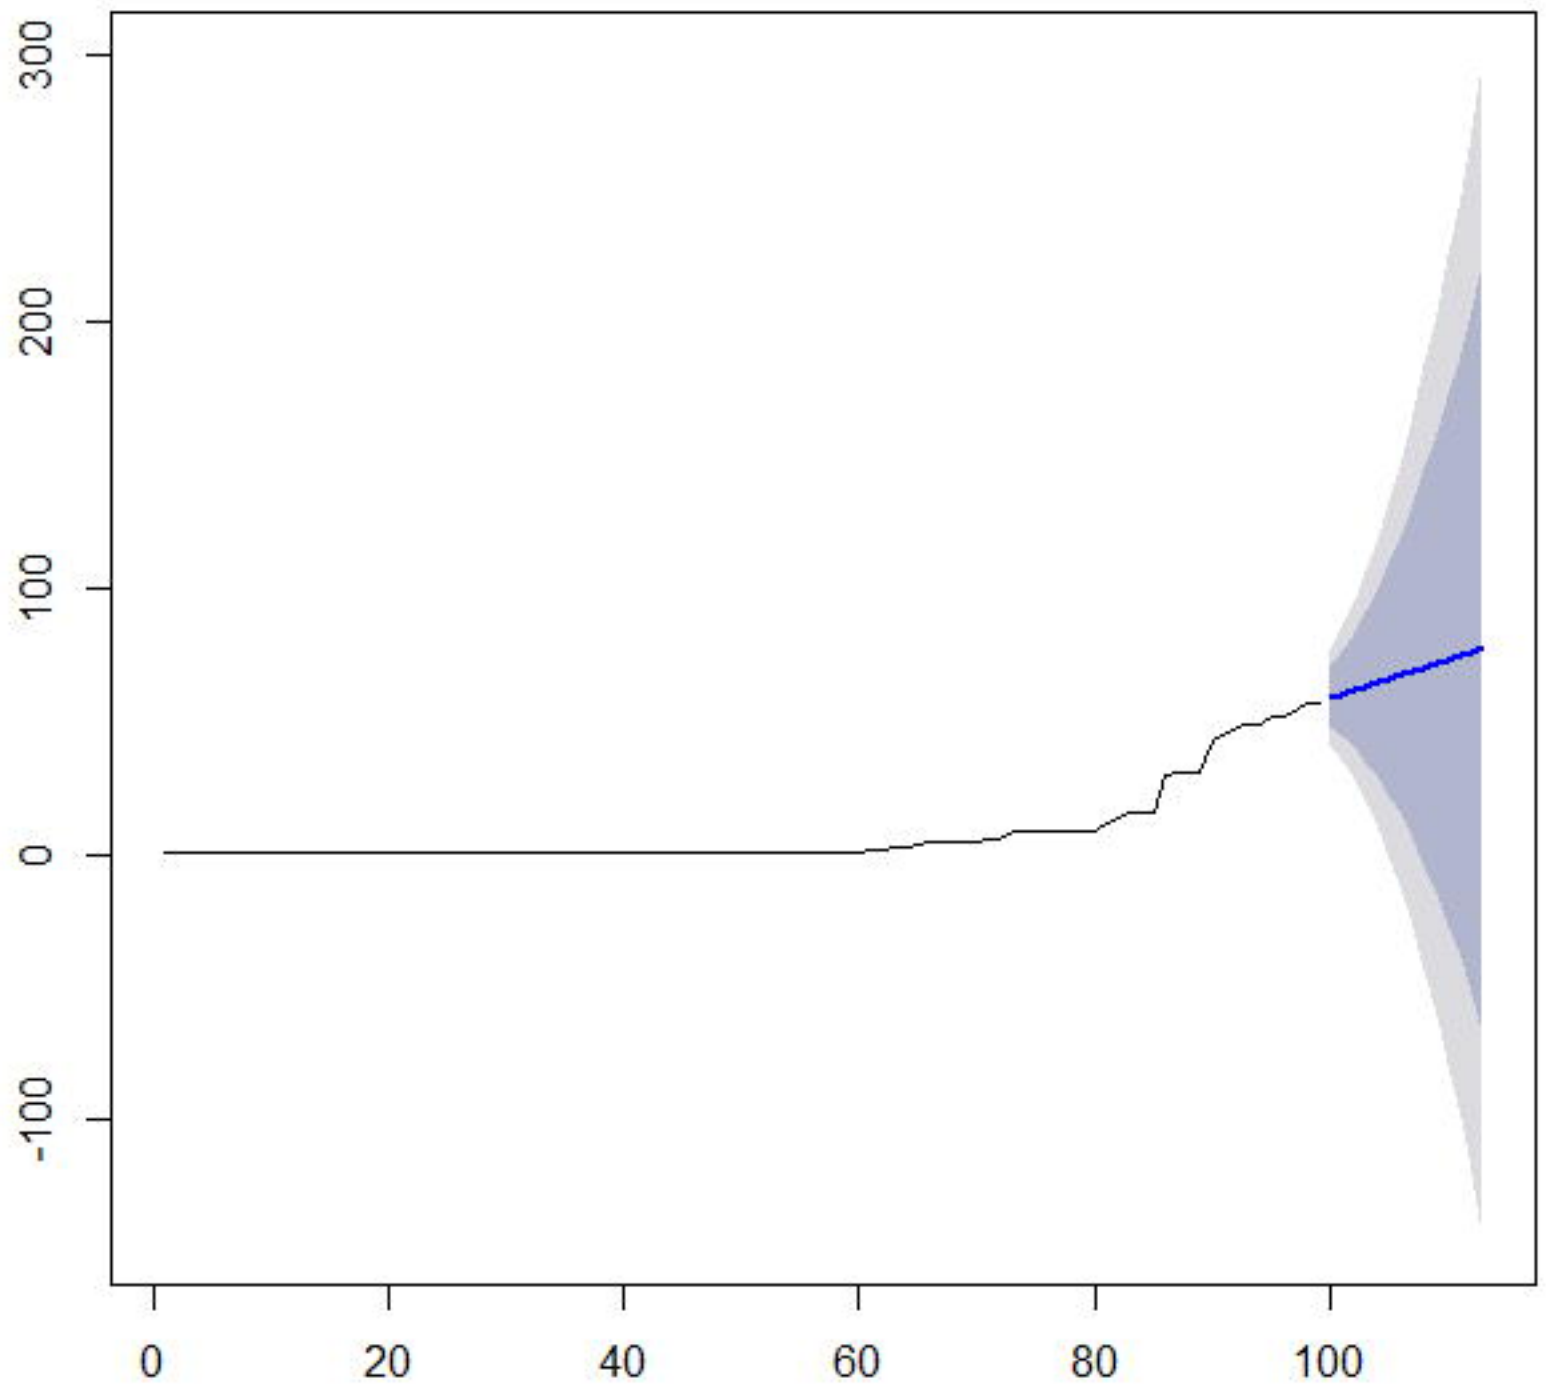

# Forecasts from ARIMA(3,2,1)

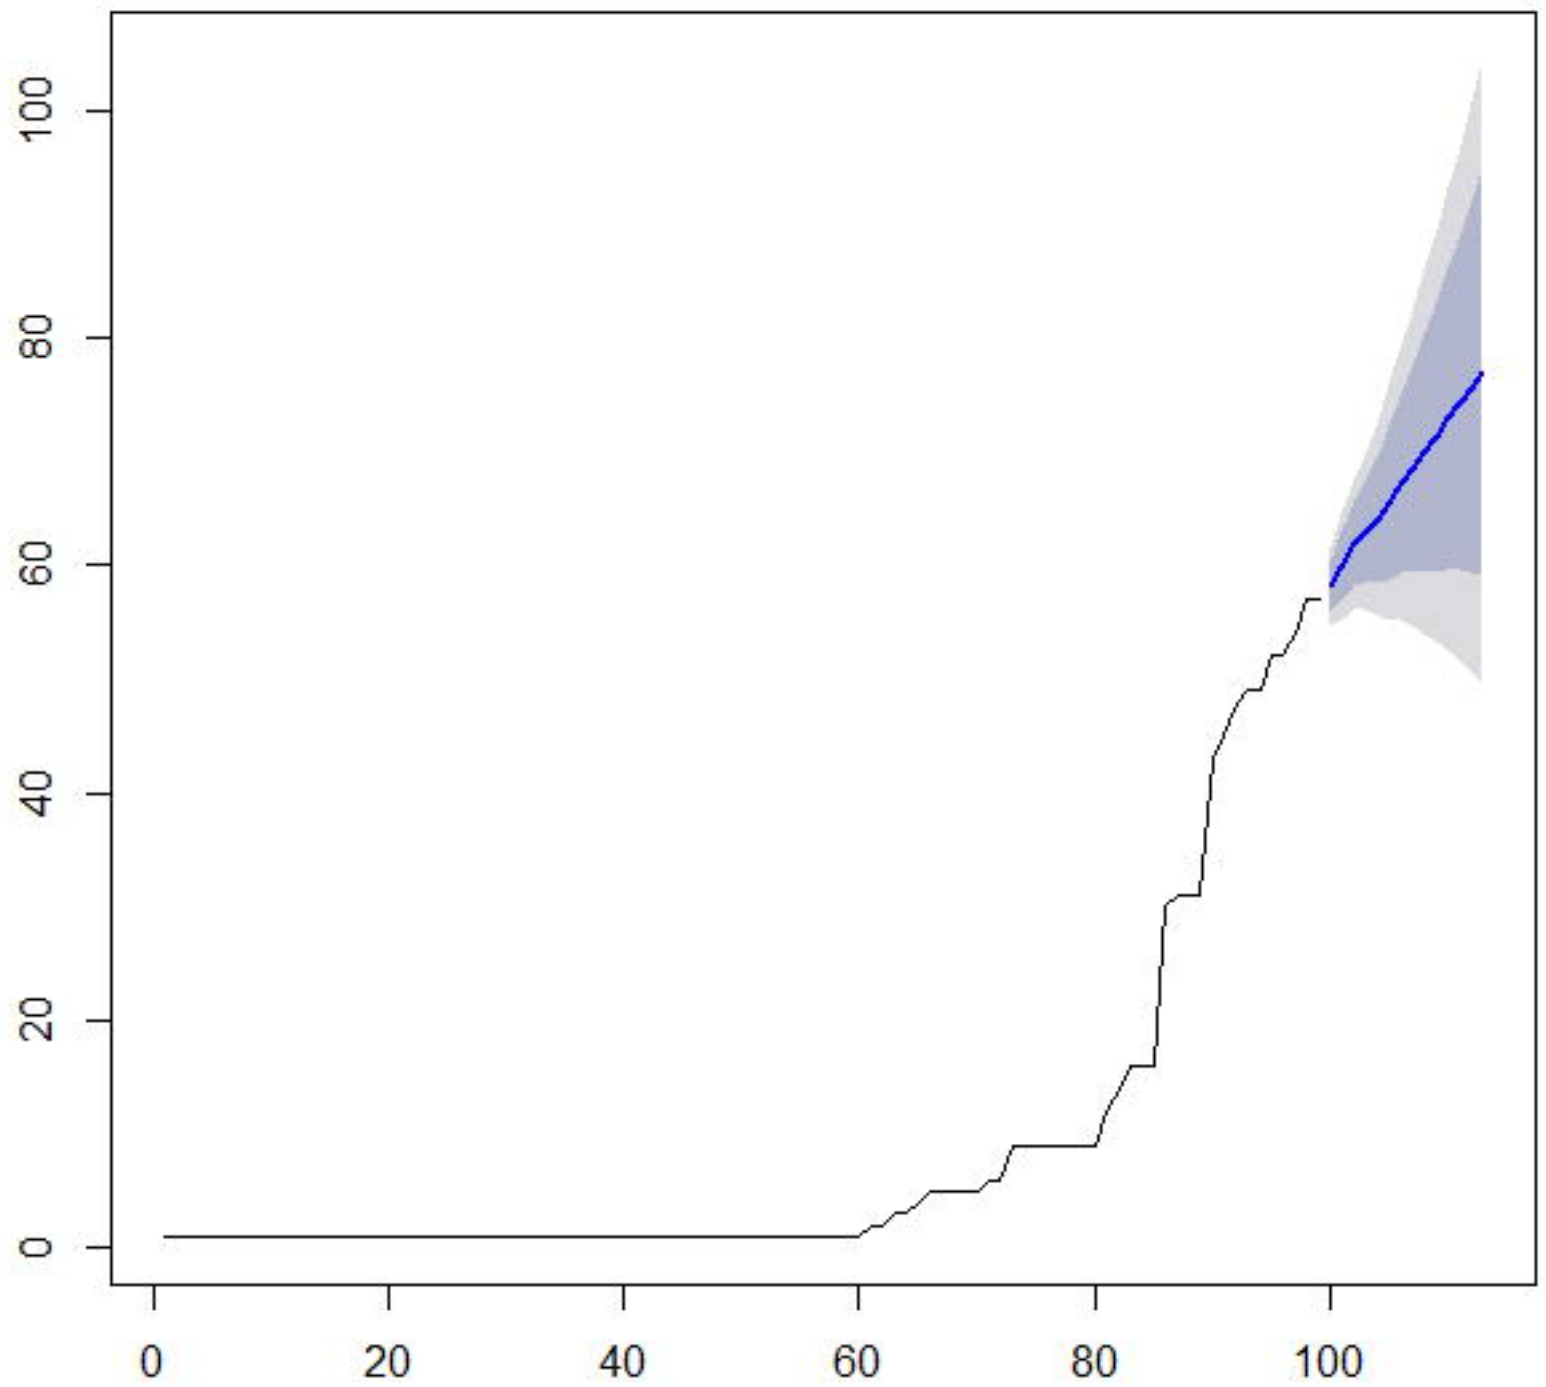

**SIR Model Fit, N = 29 million (2020) and  $R_0 = 2.5$ , Nepal**

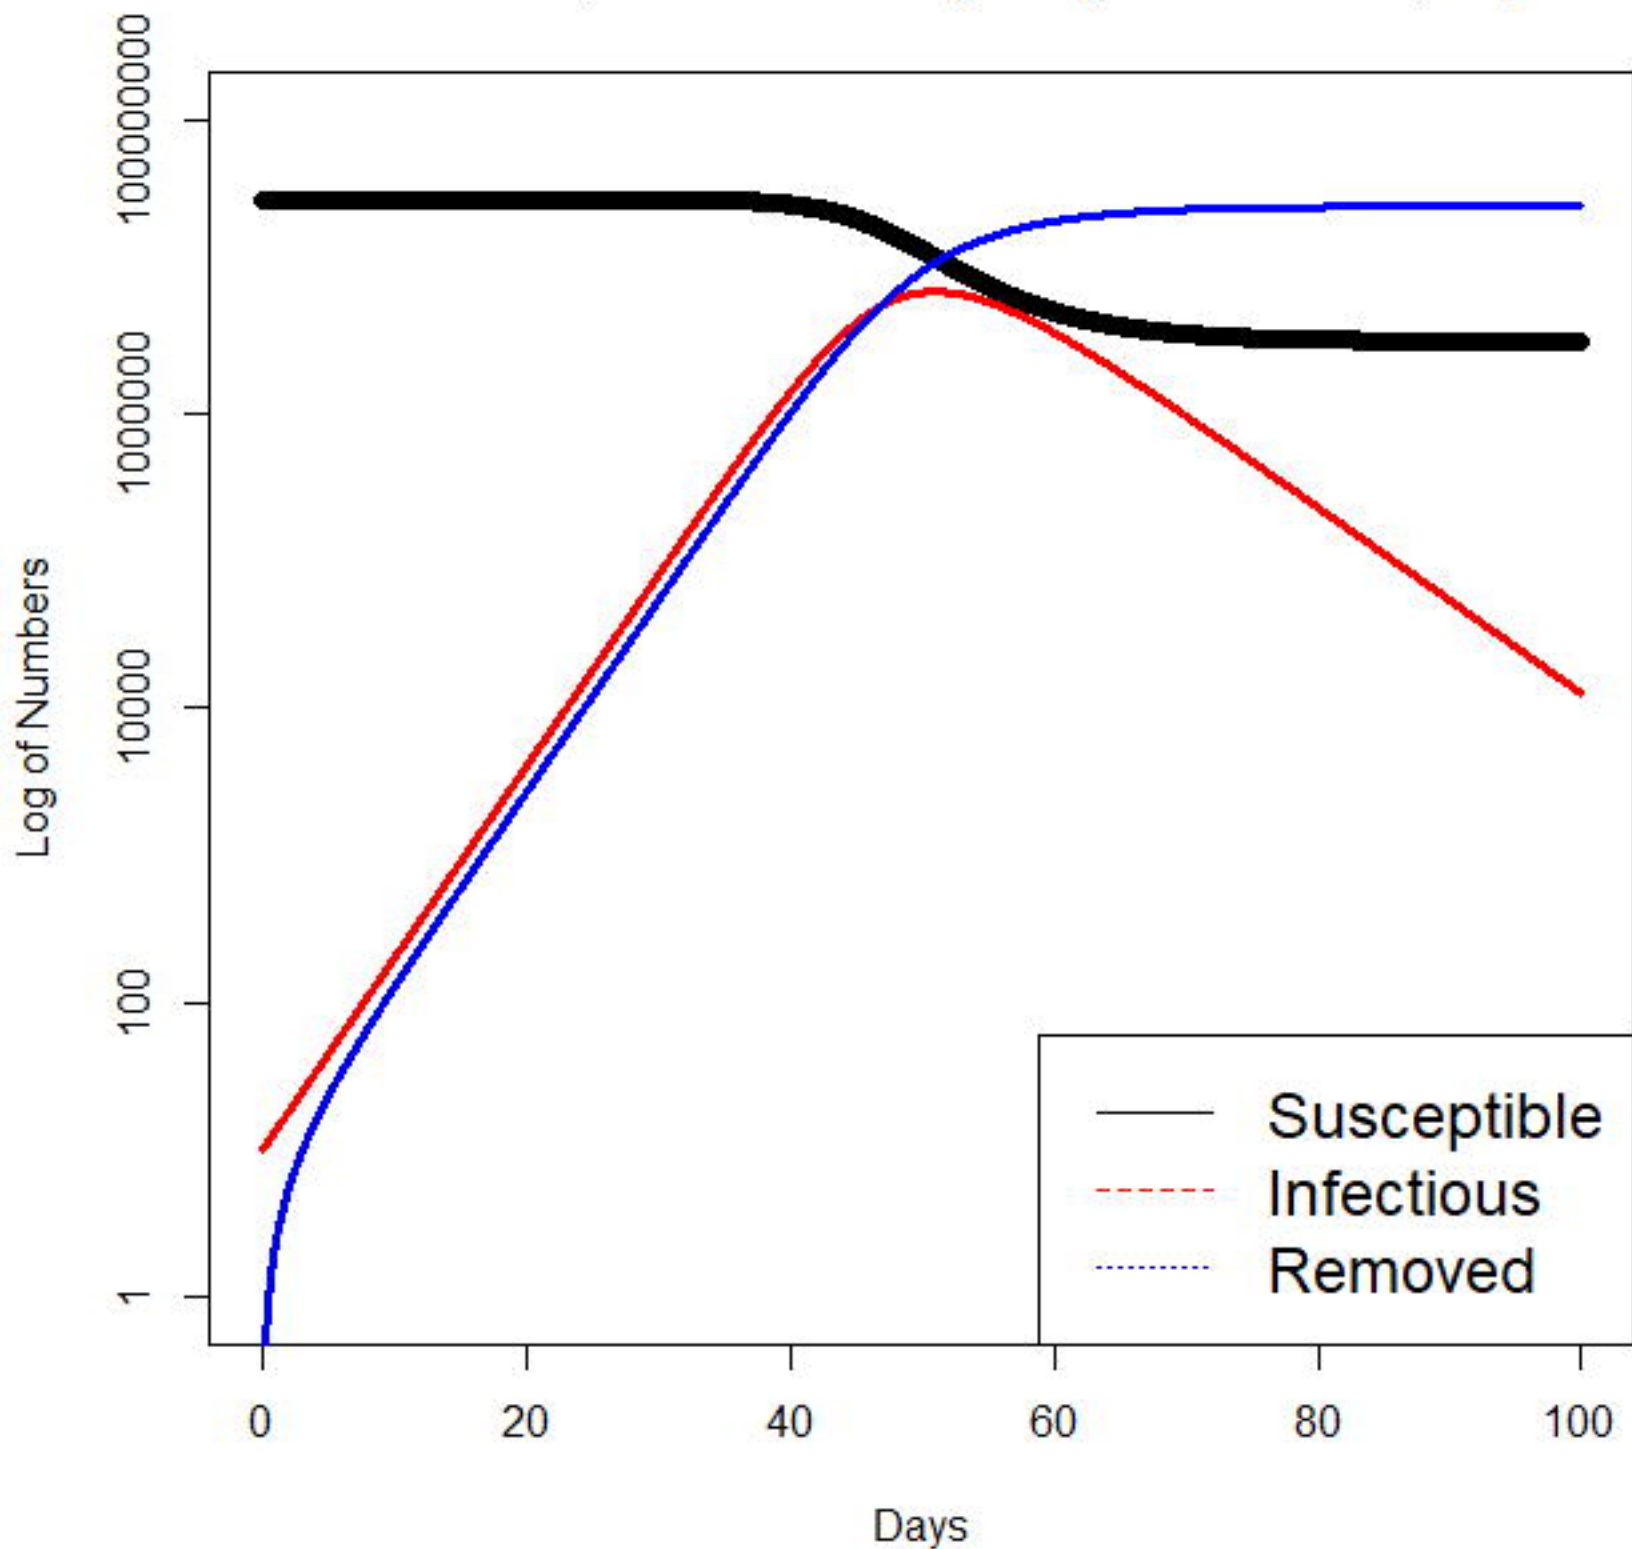

# SIR Model Fit of Nepal, N = 29 million (2020) and $R_0 = 1.0$

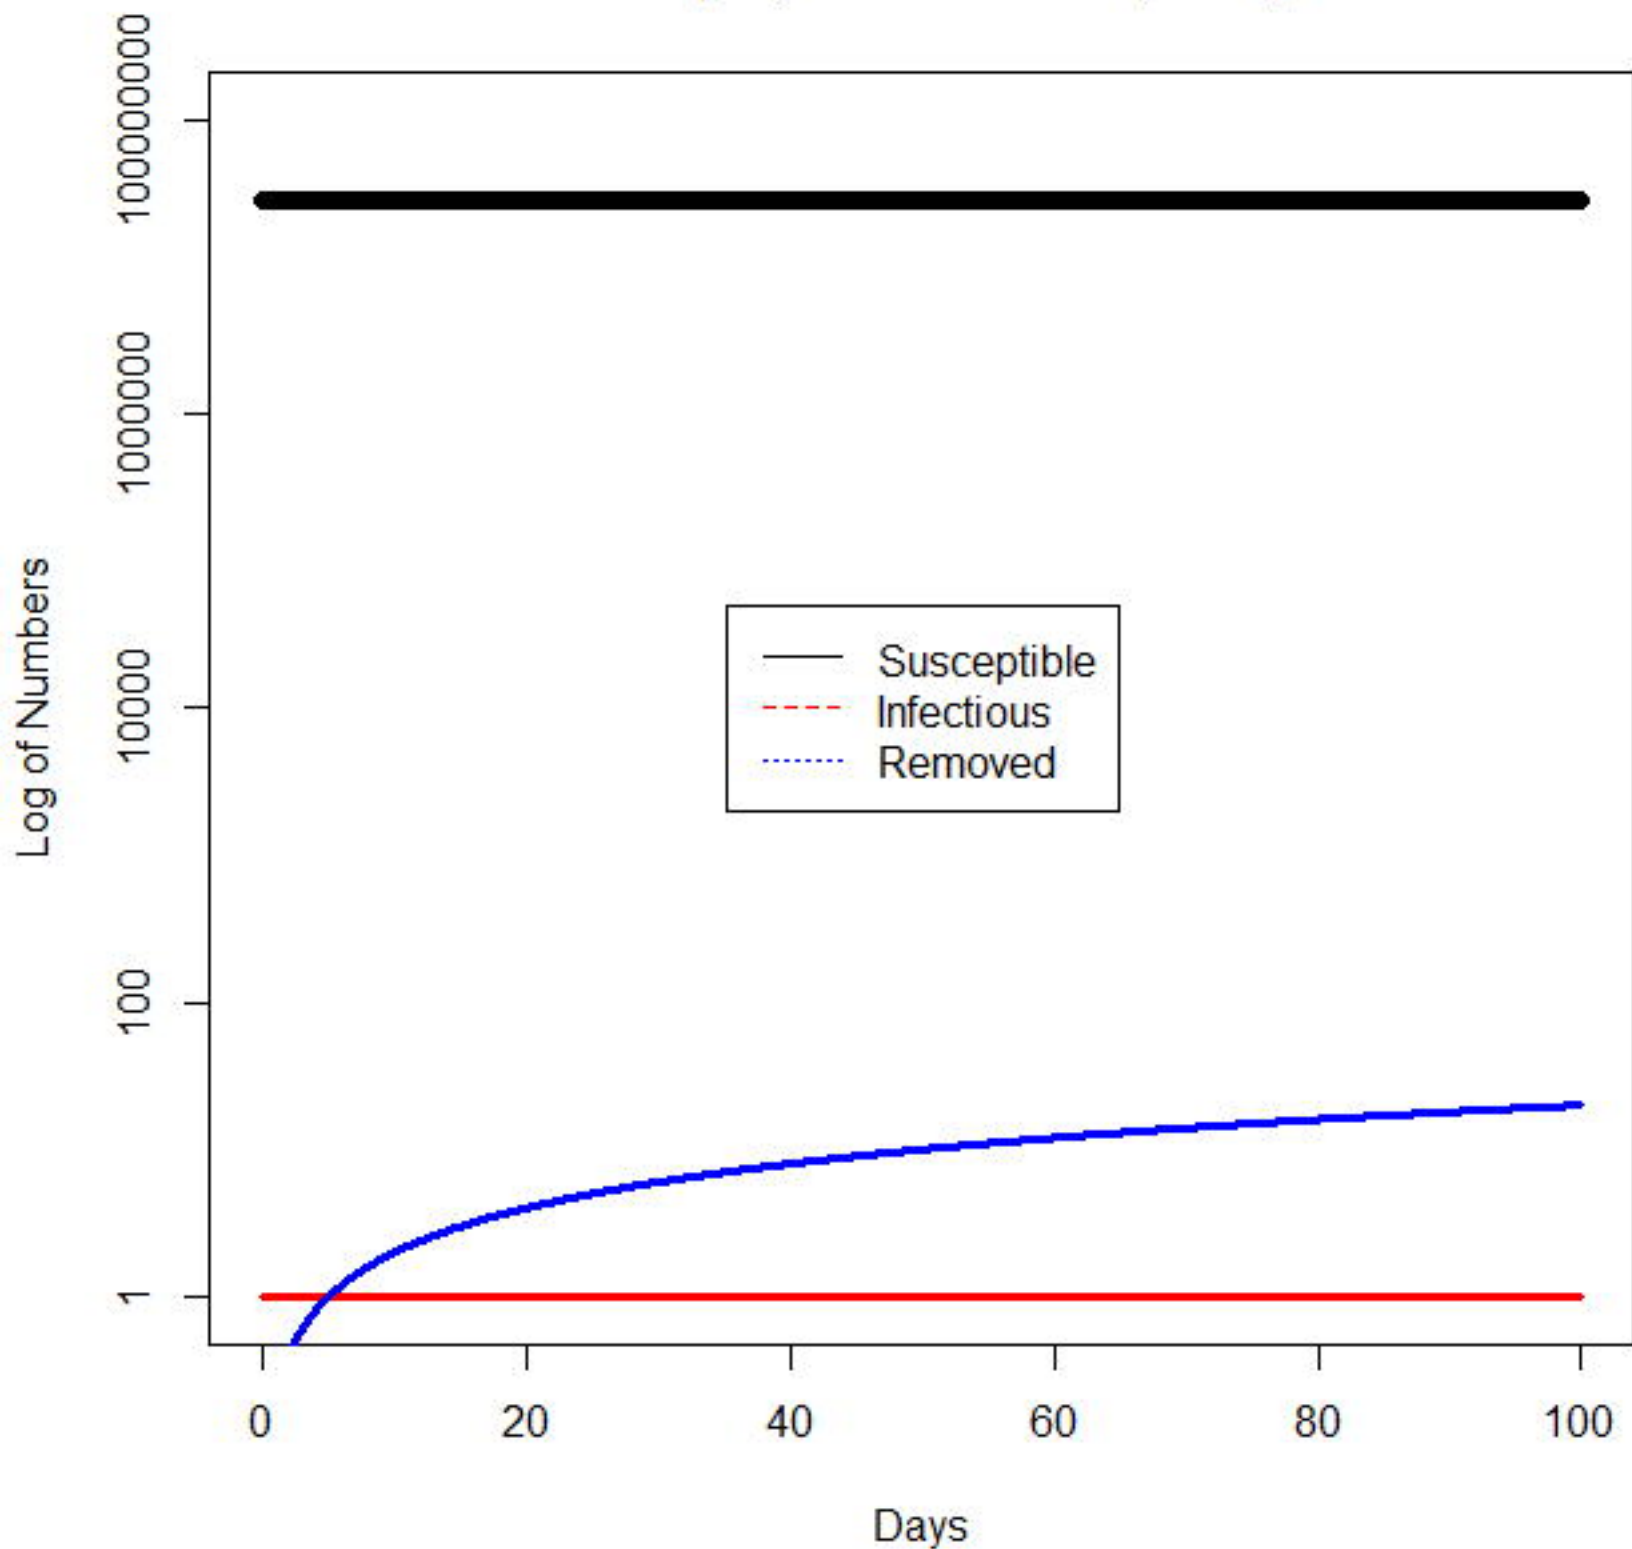

# Infected in Nepal (SIR Model Fit)

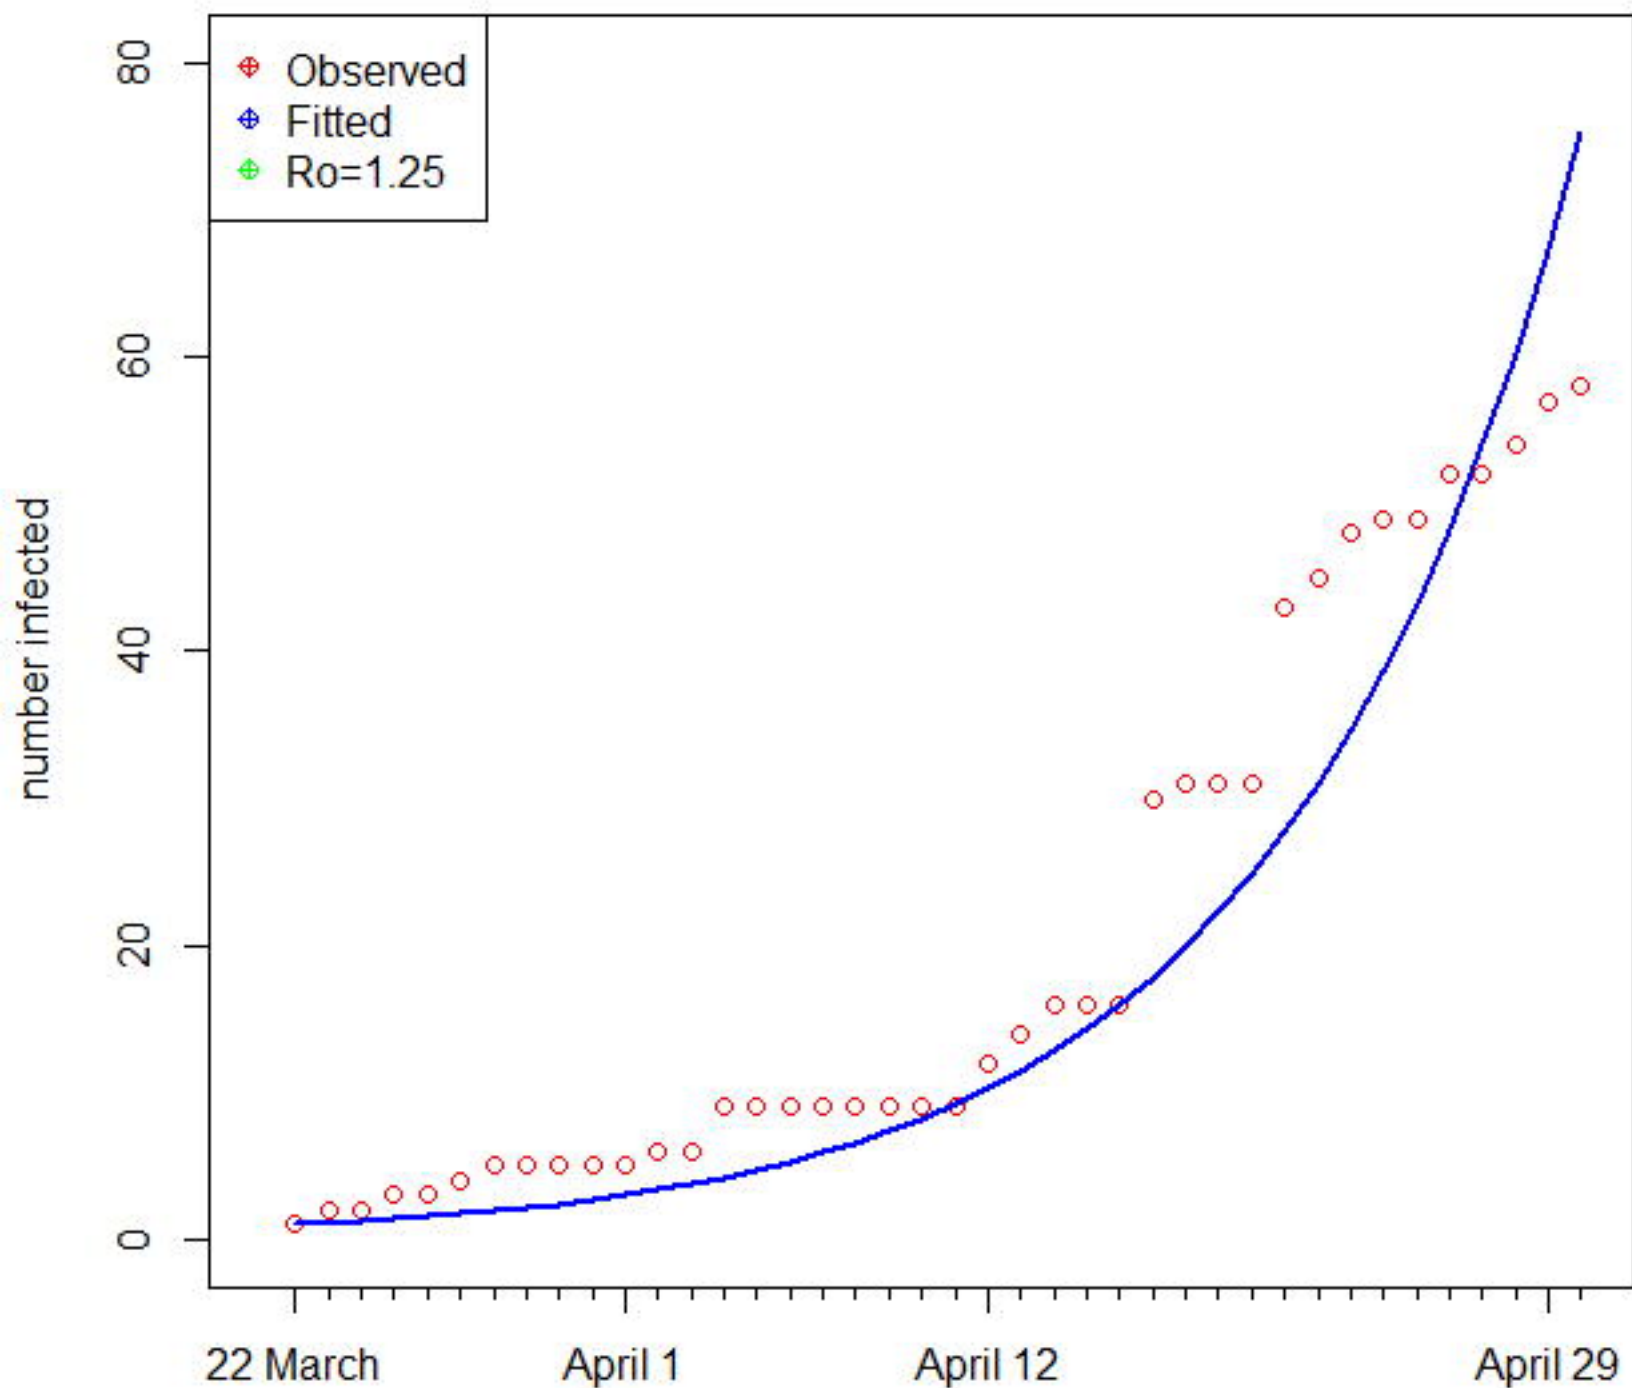

# Infected in Nepal (Data driven SIR Fit for Ro Values)

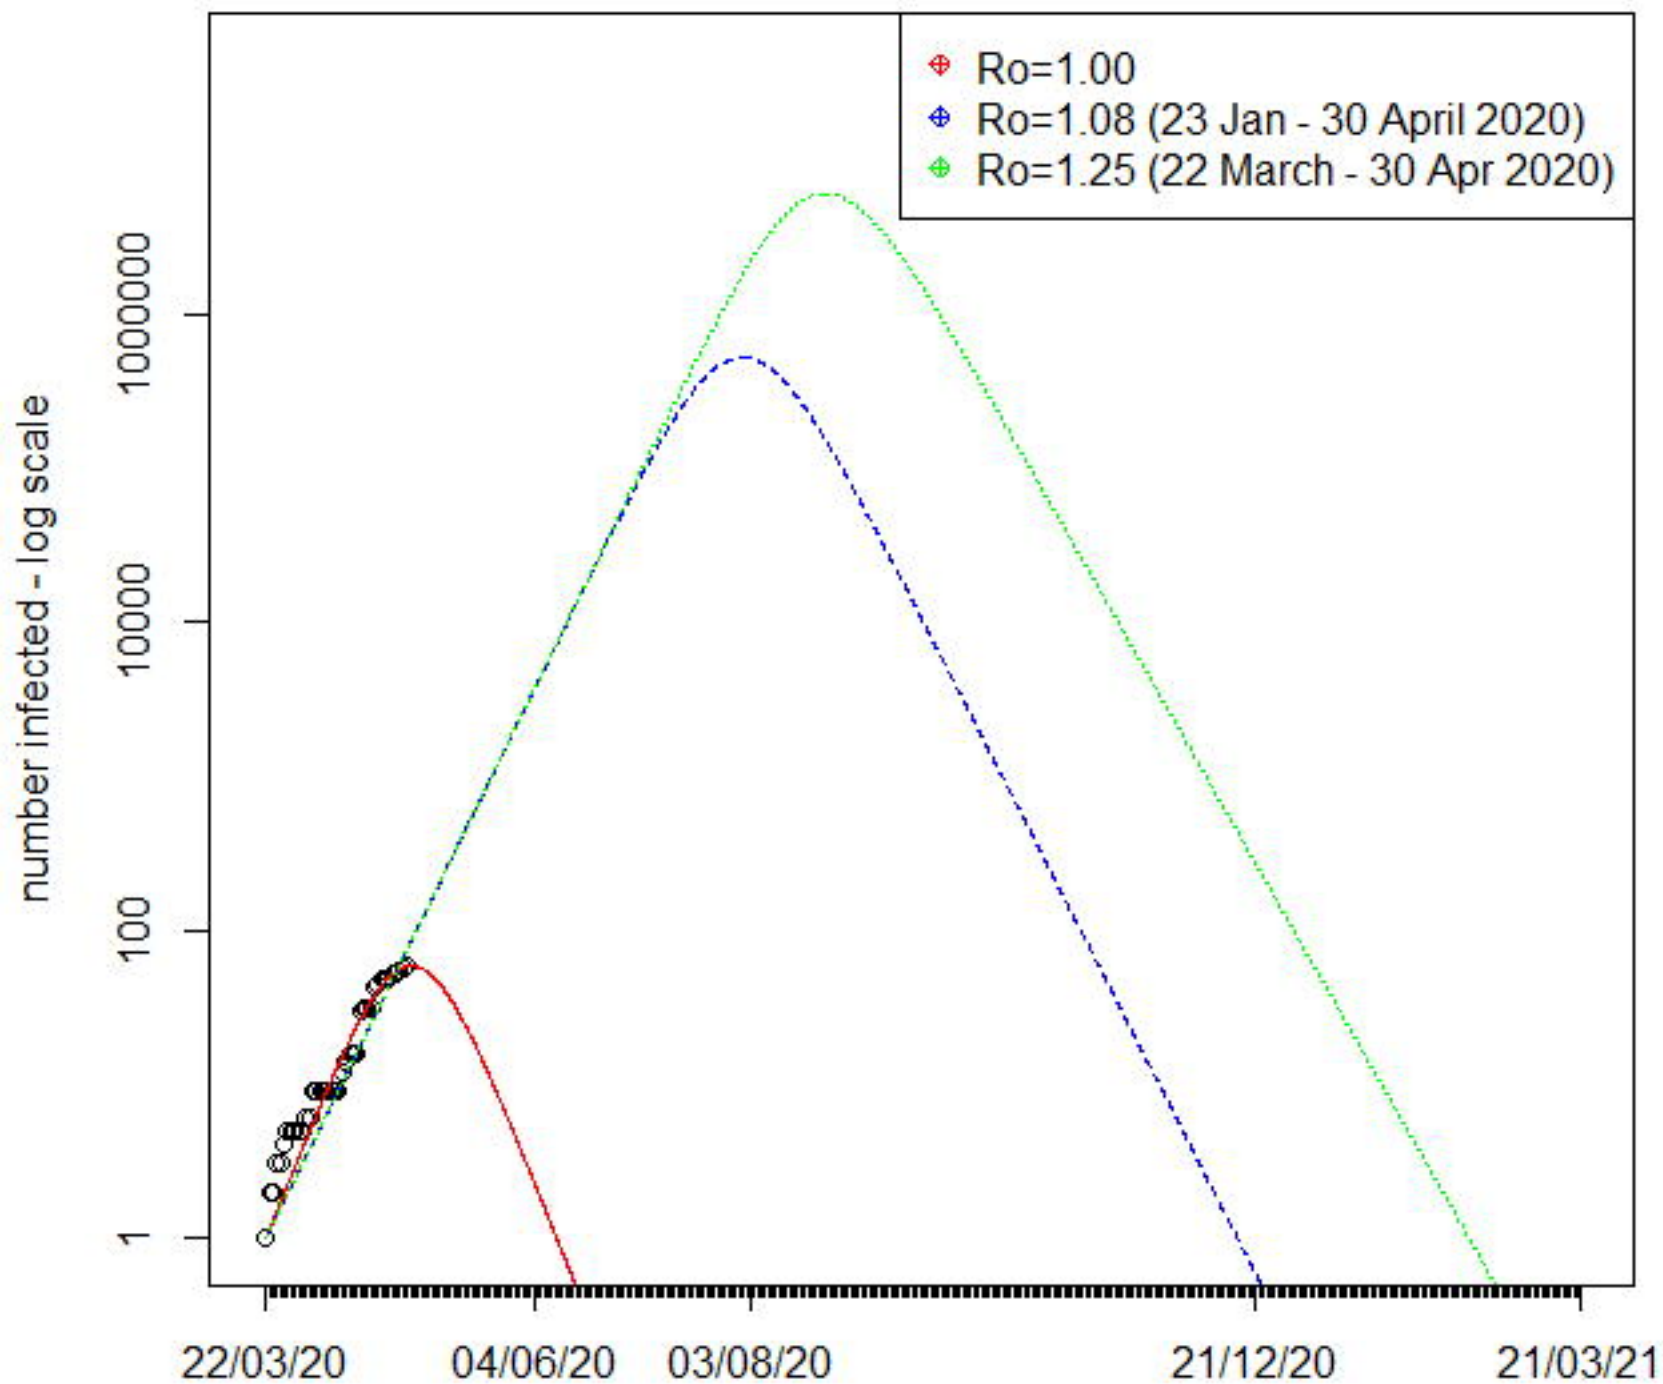

Source: http://medrxiv.org/content/10.1101/2020.05.29.20117390v1.full.pdf
